# Supplementary material for: Engineering raspberry-like CuCo2S4@ZnS hollow particles encapsulated with reduced graphene oxide for hybrid supercapacitors
Source: Royal Society of Chemistry journal article supplement (doi:10.1039/d3qm00212h), 2023-01-01
Supplement: d3qm00212h1.pdf [file d3qm00212h1.pdf]

# Engineering raspberry-like $\text{CuCo}_2\text{S}_4@\text{ZnS}$ hollow particles encapsulated by reduced graphene oxide for hybrid supercapacitor

Bahareh Ameri, Akbar Mohammadi Zardkhoshoui\*, and Saied Saeed Hosseiny Davarani\*

Department of Chemistry, Shahid Beheshti University, G. C., 1983963113, Evin, Tehran, Iran.

Corresponding authors: \*Tel: +98 21 22431661; Fax: +98 21 22431661; E-mail: [ss-hosseiny@sbu.ac.ir](mailto:ss-hosseiny@sbu.ac.ir) (S.S.H. Davarani); and [mohammadi.bahadoran@gmail.com](mailto:mohammadi.bahadoran@gmail.com) (A. Mohammadi Zardkhoshoui)

## Supporting Information

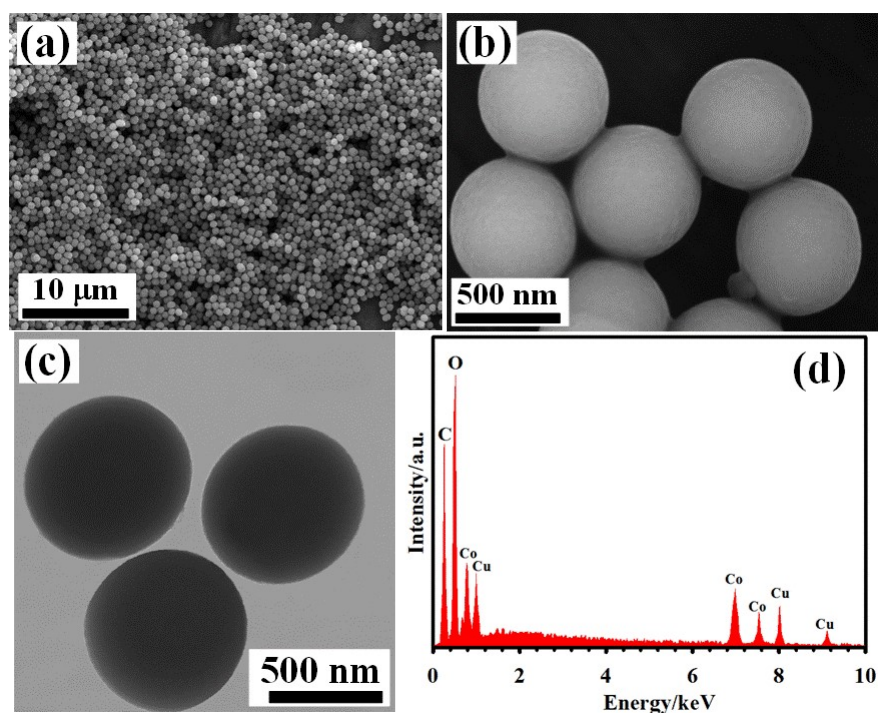

**Fig S1** (a, b) FE-SEM images of the CC-GSSs. (c) TEM image of the CC-GSSs. (d) EDX pattern of the CC-GSSs.

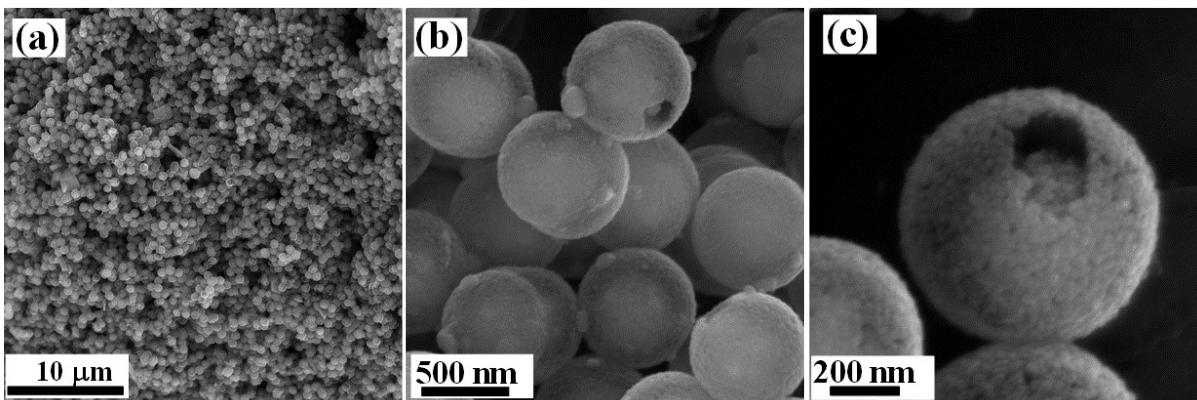

**Fig S2** (a-c) FE-SEM images of the CCS-HSs.

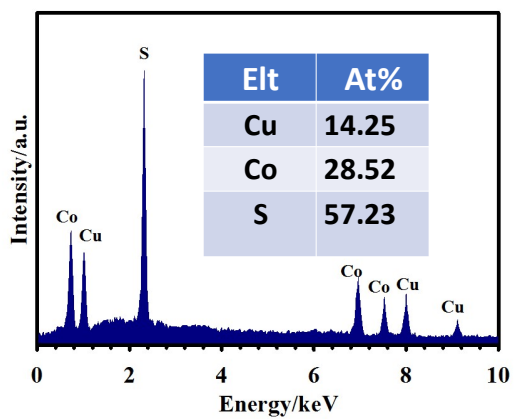

**Fig S3** EDX pattern of the CCS-HSs.

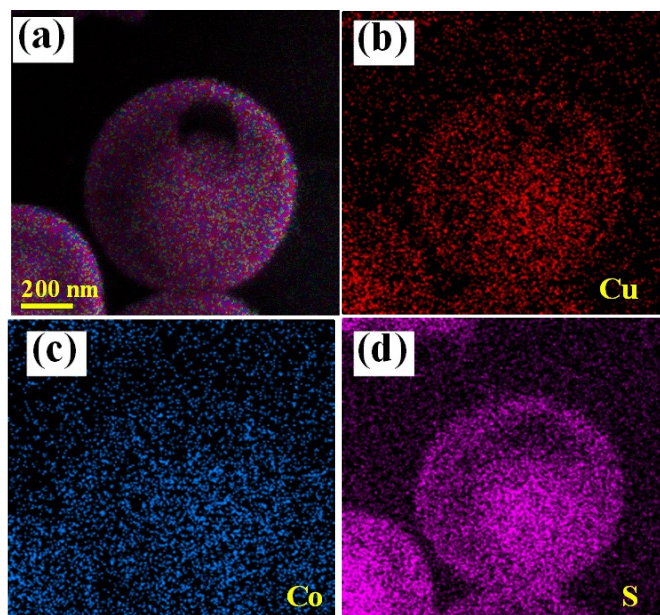

**Fig S4** FE-SEM mapping images of the CCS-HSs.

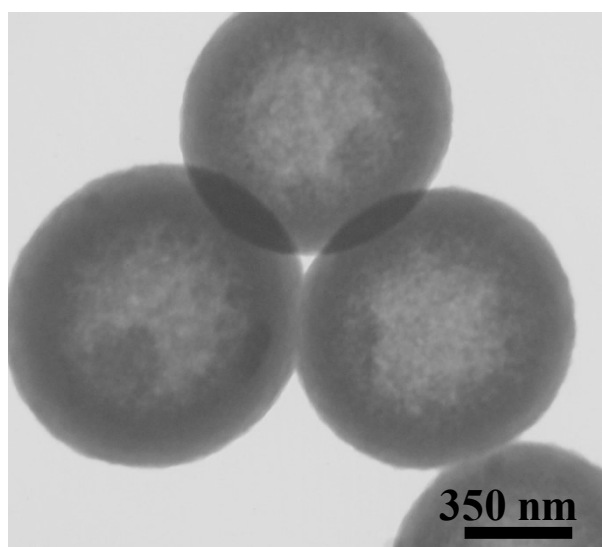

**Fig S5** TEM image of the CCS-HSs.

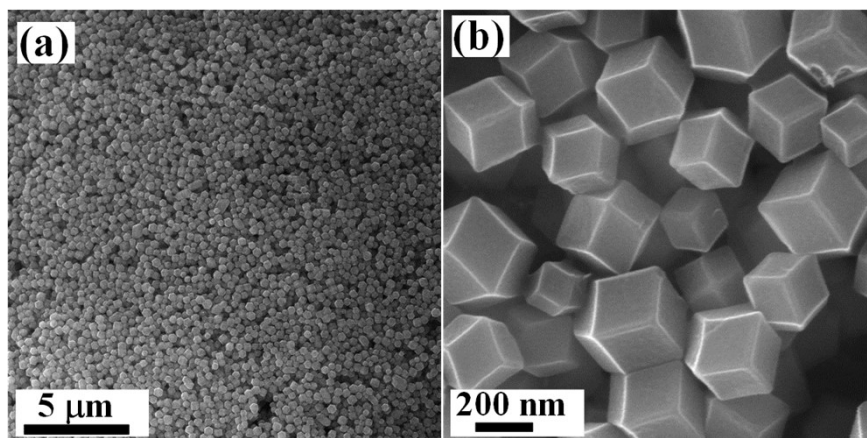

**Fig S6** (a, b) FE-SEM images of the ZIF-8.

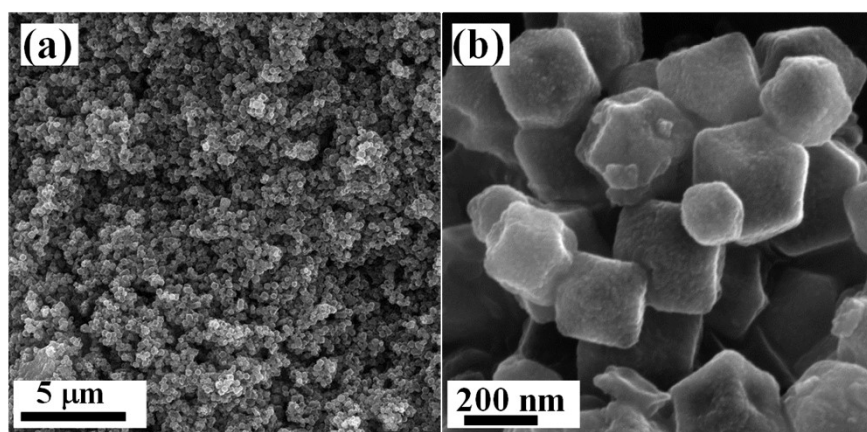

**Fig S7** (a, b) FE-SEM images of the ZnS.

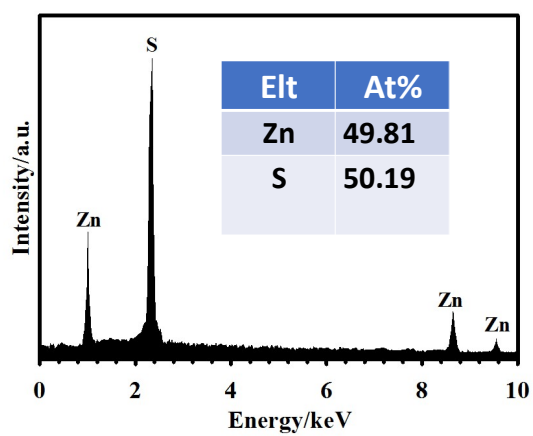

**Fig S8** EDX pattern of the ZnS.

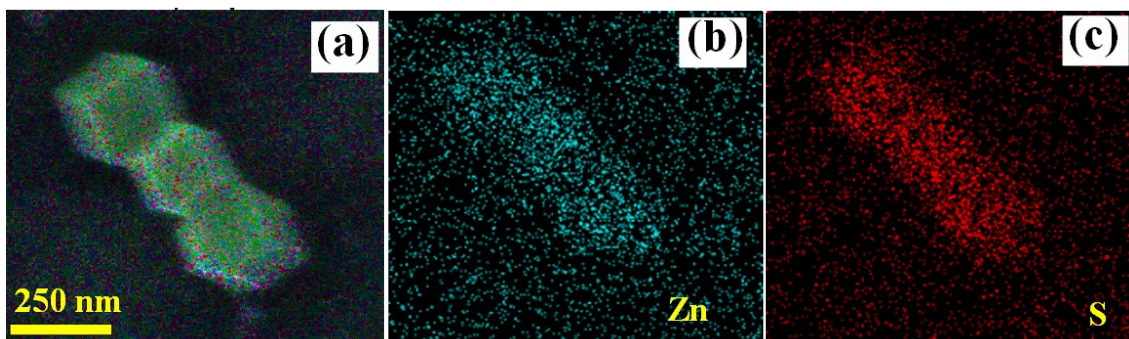

Fig S9 FE-SEM mapping images of the ZnS.

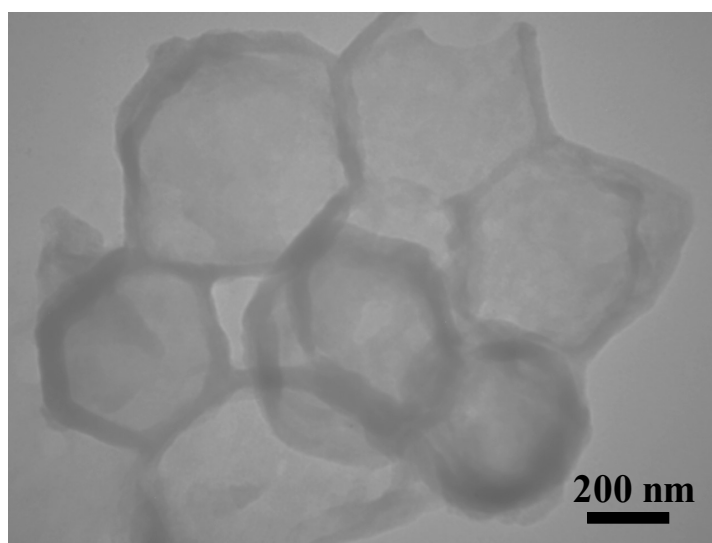

Fig S10 TEM image of the ZnS.

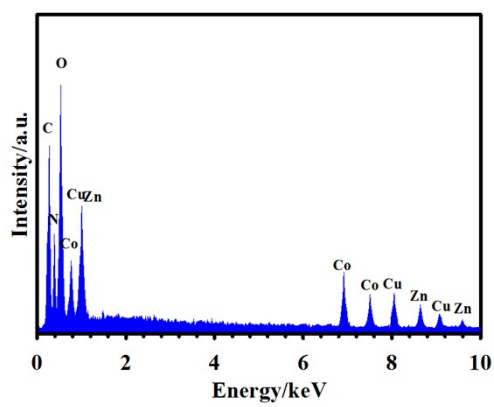

Fig S11 EDX pattern of the CC-G@ZIF-8.

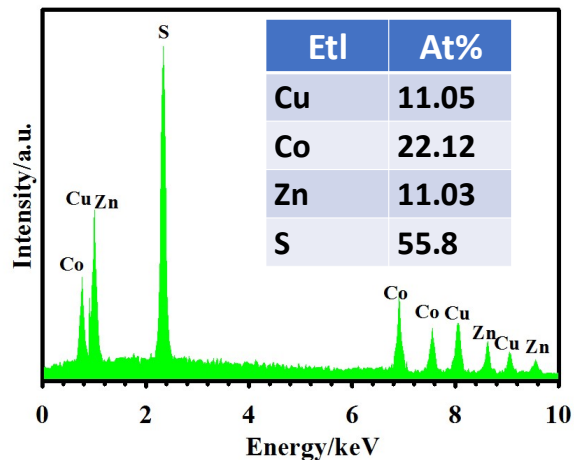

**Fig S12** EDX pattern of the RCCS-ZSH8 sample.

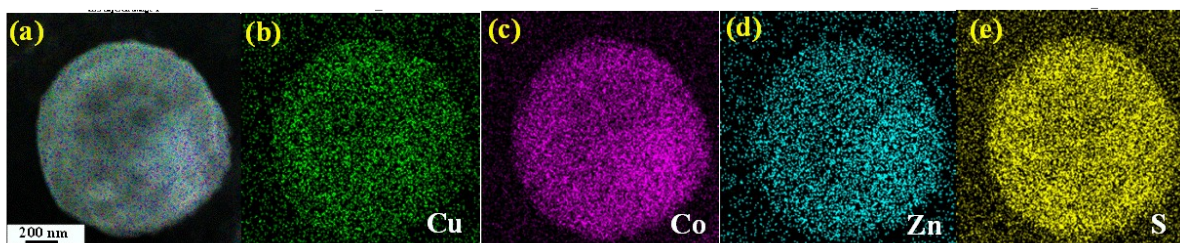

**Fig S13** FE-SEM mapping images of the RCCS-ZSH8 sample.

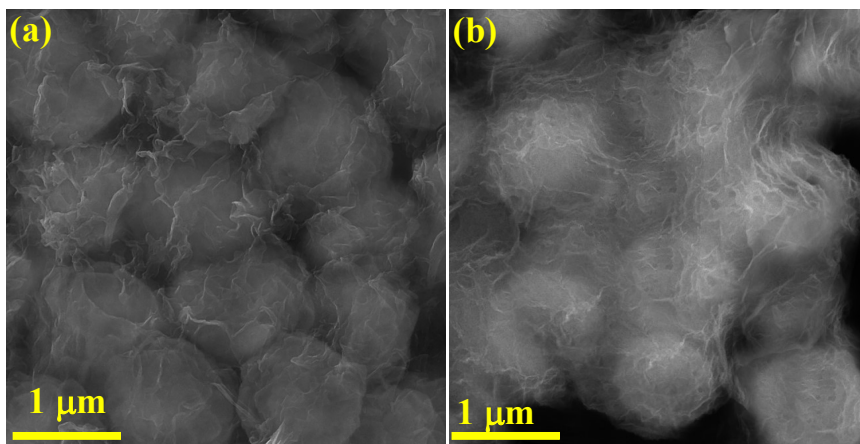

**Fig S14** (a) FE-SEM images of the RCCS-ZSH8-rGO1 sample. (b) FE-SEM images of the RCCS-ZSH8-rGO3 sample.

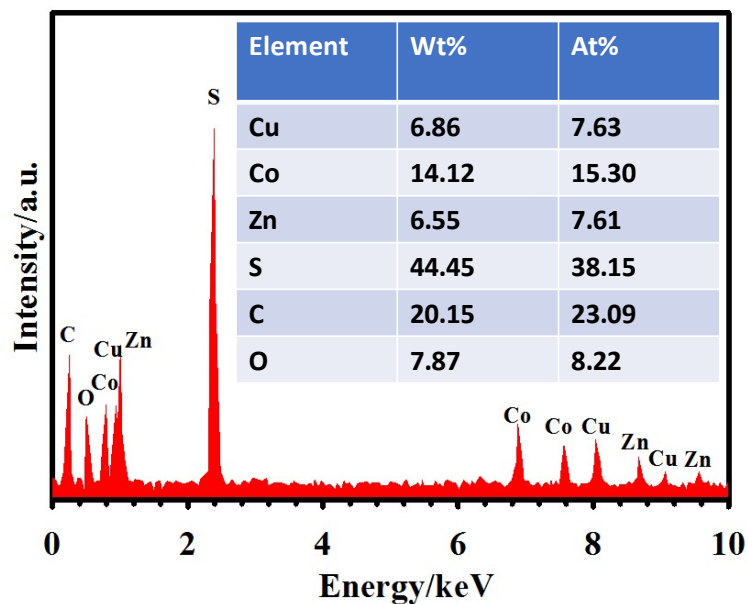

**Fig S15** EDX pattern of the RCCS-ZSH8-rGO2 sample.

The EDX analysis of the RCCS-ZSH8-rGO2 reveals the weight percentage of Cu, Co, Zn, S, C, and O elements in the RCCS-ZSH8-rGO2 are about 6.86%, 14.12%, 6.55%, 44.45%, 20.15%, and 7.87%. Accordingly, the contents of  $\text{CuCo}_2\text{S}_4$ ,  $\text{ZnS}$ , and rGO in the RCCS-ZSH8-rGO2 are estimated to be 56.54 wt%, 15.44 wt%, and 28.02 wt%, respectively. Based on the weight of Cu (6.86%), Co (14.12%), and S (44.45%) elements, the content of the  $\text{CuCo}_2\text{S}_4$  in the RCCS-ZSH8-rGO2 is calculated as about 56.54 wt% [ $6.86\% + 14.12\% + (44.45/5\%)\times 4\%$ ], the content of the  $\text{ZnS}$  in the RCCS-ZSH8-rGO2 is calculated as about 15.44 wt% [ $(6.55\% + (44.45/5\%))$ ], and content of the rGO in the RCCS-ZSH8-rGO2 is calculated as about 28.02 wt% [ $100\% - (56.54\%+15.44\%)$ ]. Hence, the weight ratio of  $\text{CuCo}_2\text{S}_4$ ,  $\text{ZnS}$ , and rGO in the RCCS-ZSH-rGO2 can be calculated, as approximately 1.83:0.50:0.90.

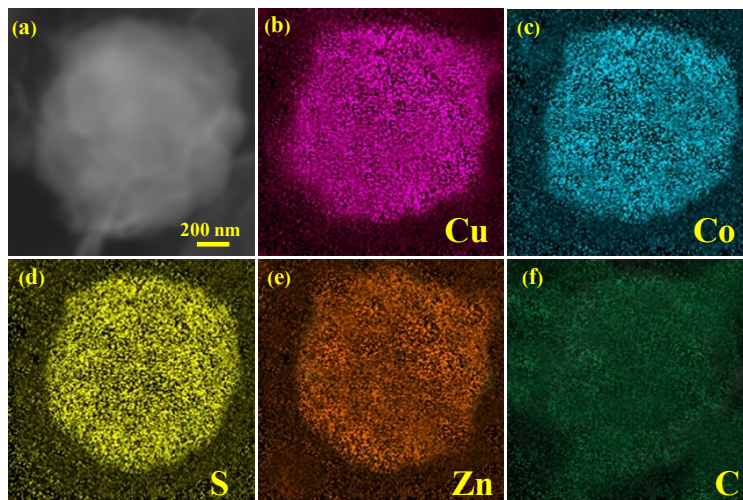

**Fig S16** FE-SEM mapping images of the RCCS-ZSH8-rGO2 sample.

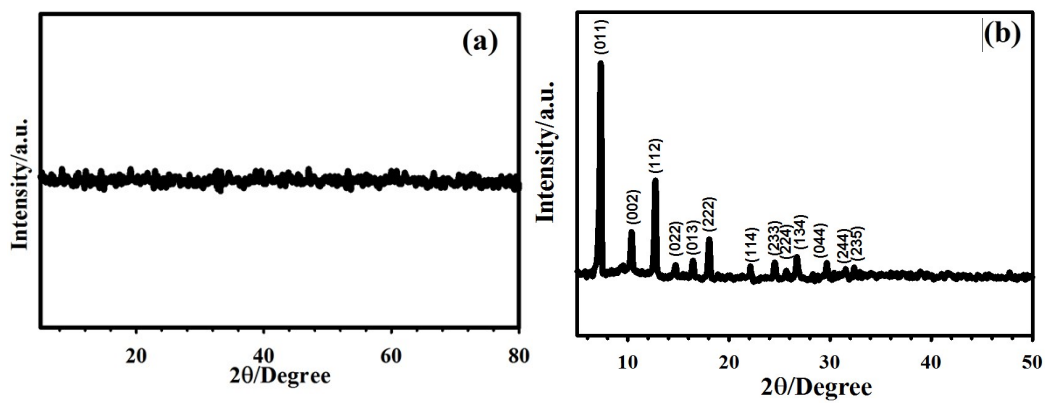

**Fig S17** (a) XRD pattern of the CC-GSSs. (b) XRD pattern of the CC-G@ZIF-8.

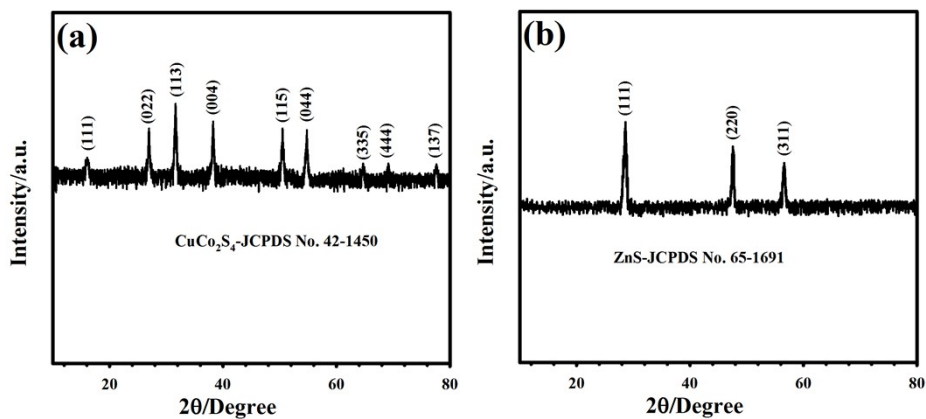

**Fig S18** (a) XRD pattern of the CCS-HSs. (b) XRD pattern of the ZnS.



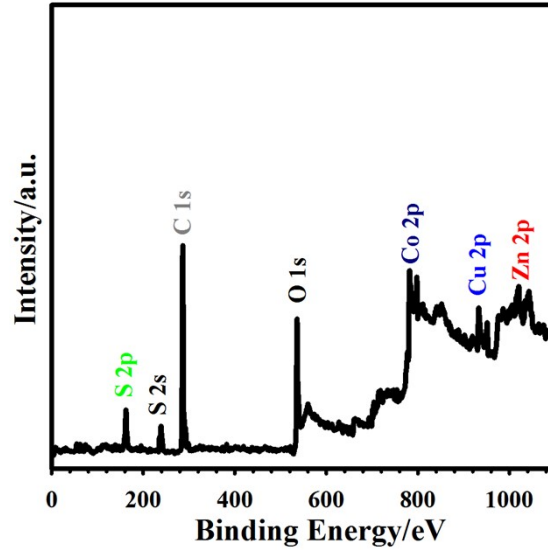

Fig S19 XPS survey of the RCCS-ZSH8-rGO2 sample.

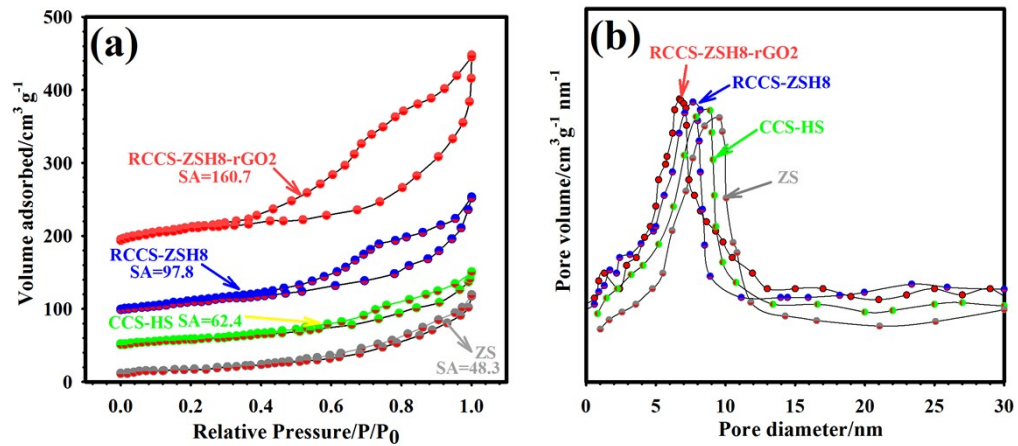

Fig S20 (a) BET plots of the RCCS-ZSH8-rGO2, RCCS-ZSH8, CCS-HS, and ZnS samples. (b) BJH curves of the RCCS-ZSH8-rGO2, RCCS-ZSH8, CCS-HS, and ZnS samples.

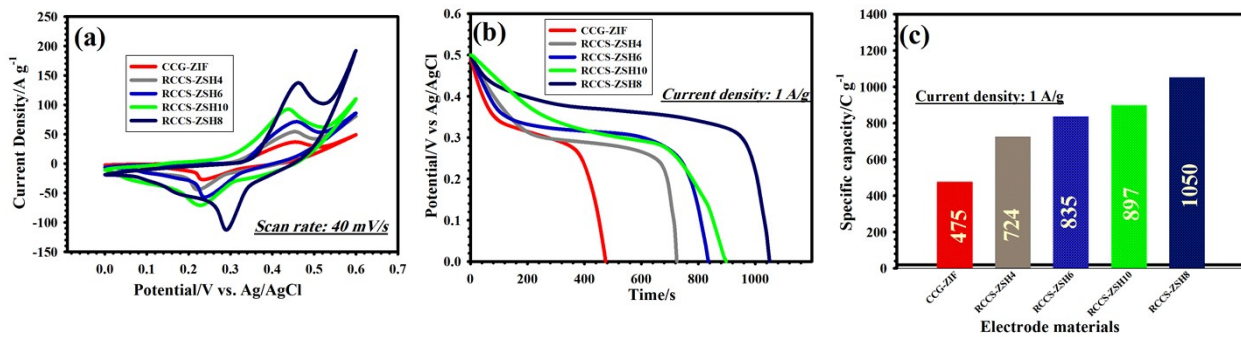

**Fig S21** (a) CV curves of the CCG-ZIF, RCCS-ZSH4, RCCS-ZSH6, RCCS-ZSH8, and RCCS-ZSH10 electrodes at  $40 \text{ mV s}^{-1}$ . (b) Discharge curves of the CCG-ZIF, RCCS-ZSH4, RCCS-ZSH6, RCCS-ZSH8, and RCCS-ZSH10 electrodes at  $1 \text{ A g}^{-1}$ . (c) Specific capacities of the CCG-ZIF, RCCS-ZSH4, RCCS-ZSH6, RCCS-ZSH8, and RCCS-ZSH10 electrodes at  $1 \text{ A g}^{-1}$ .

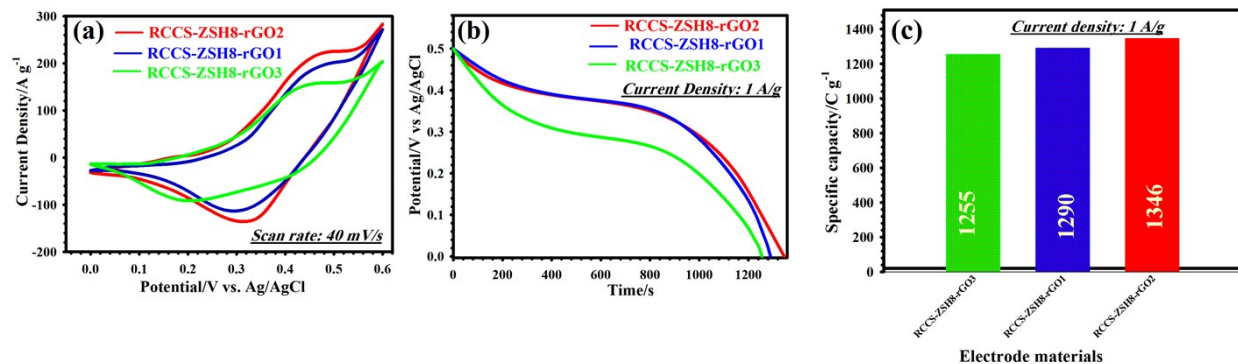

**Fig S22** (a) CV curves of the RCCS-ZSH8-rGO1, RCCS-ZSH8-rGO2, and RCCS-ZSH8-rGO3 electrodes at  $40 \text{ mV s}^{-1}$ . (b) Discharge curves of the RCCS-ZSH8-rGO1, RCCS-ZSH8-rGO2, and RCCS-ZSH8-rGO3 electrodes at  $1 \text{ A g}^{-1}$ . (c) Specific capacities of the RCCS-ZSH8-rGO1, RCCS-ZSH8-rGO2, and RCCS-ZSH8-rGO3 electrodes at  $1 \text{ A g}^{-1}$ .

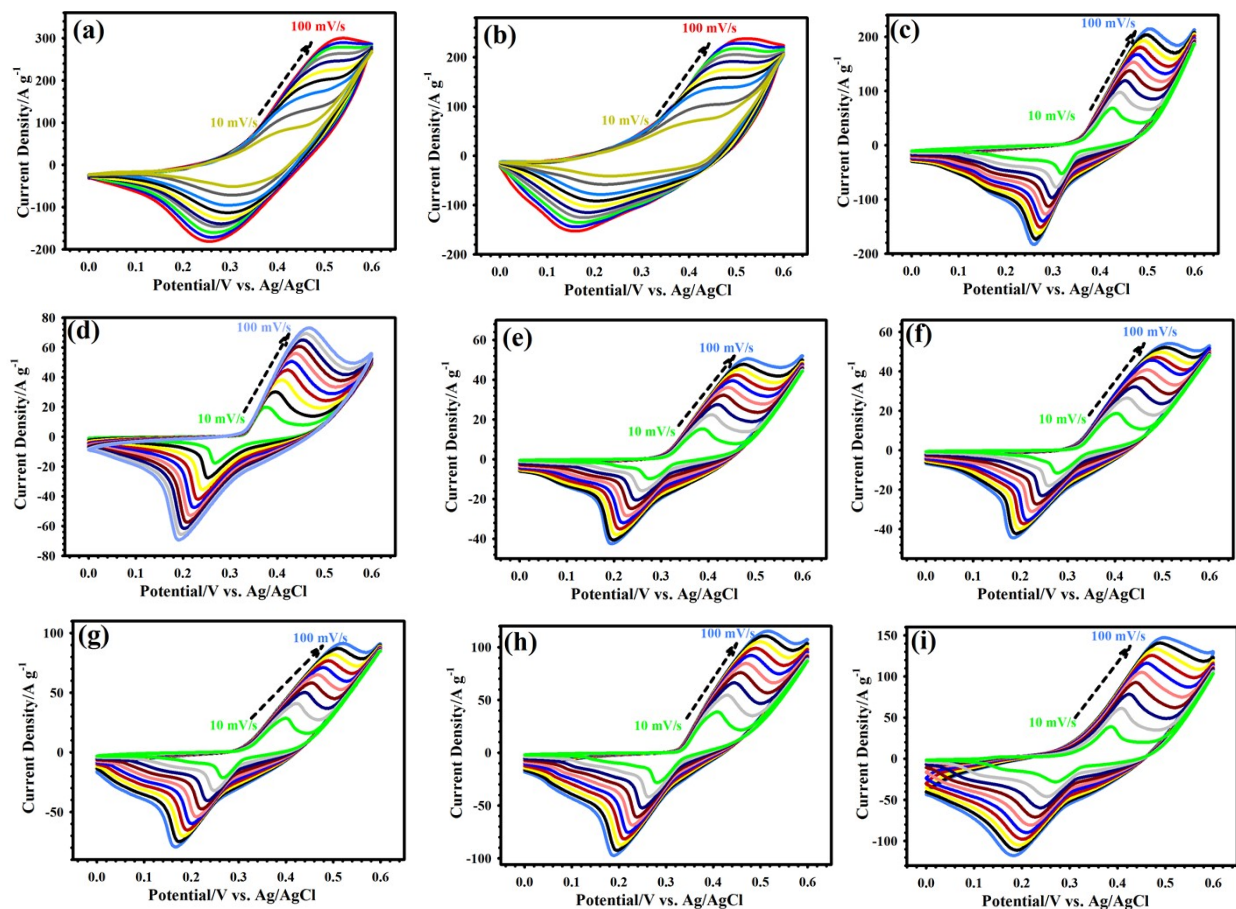

**Fig S23** (a) CV curves of the RCCS-ZSH8-rGO1 electrode at various scan rates from 10 to 100  $\text{mV s}^{-1}$ . (b) CV curves of the RCCS-ZSH8-rGO3 electrode at various scan rates from 10 to 100  $\text{mV s}^{-1}$ . (c) CV curves of the RCCS-ZSH8 electrode at various scan rates from 10 to 100  $\text{mV s}^{-1}$ . (d) CV curves of the CCS-HS electrode at various scan rates from 10 to 100  $\text{mV s}^{-1}$ . (e) CV curves of the ZS electrode at various scan rates from 10 to 100  $\text{mV s}^{-1}$ . (f) CV curves of the CC-G@ZIF electrode at various scan rates from 10 to 100  $\text{mV s}^{-1}$ . (g) CV curves of the RCCS-ZSH4 electrode at various scan rates from 10 to 100  $\text{mV s}^{-1}$ . (h) CV curves of the RCCS-ZSH6 electrode at various scan rates from 10 to 100  $\text{mV s}^{-1}$ . (i) CV curves of the RCCS-ZSH10 electrode at various scan rates from 10 to 100  $\text{mV s}^{-1}$ .

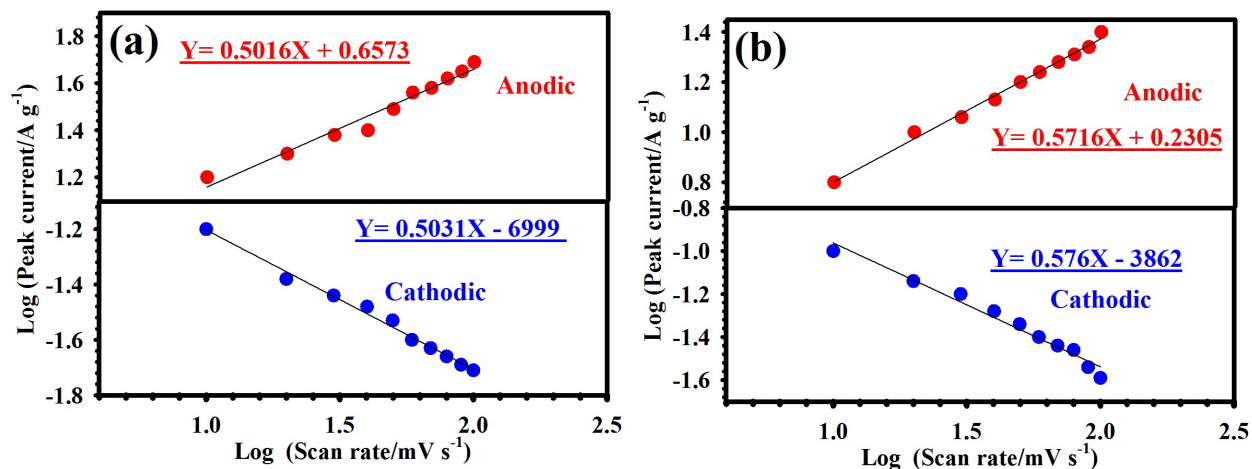

**Fig S24** (a) Linear relation between the plot of the Logarithm (i) versus Logarithm (v) of the CCS-HS electrode. (b) Linear relation between the plot of the Logarithm (i) versus Logarithm (v) of the ZS electrode.

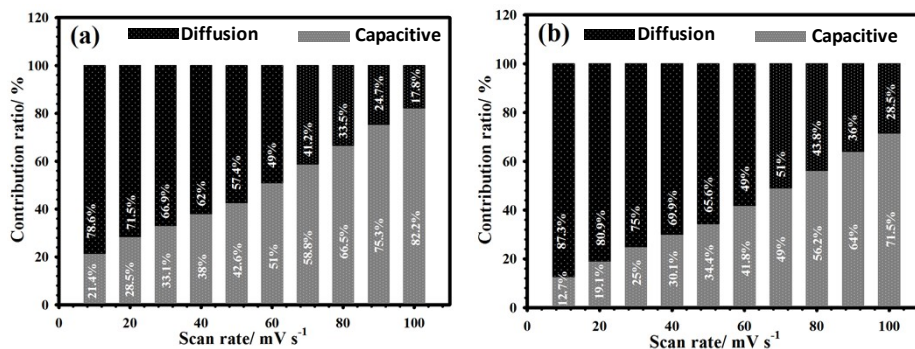

**Fig S25** (a) Diffusion and capacitive contributions of the RCCS-ZSH8-rGO2 electrode at different scan rates. (b) Diffusion and capacitive contributions of the RCCS-ZSH8 electrode at different scan rates

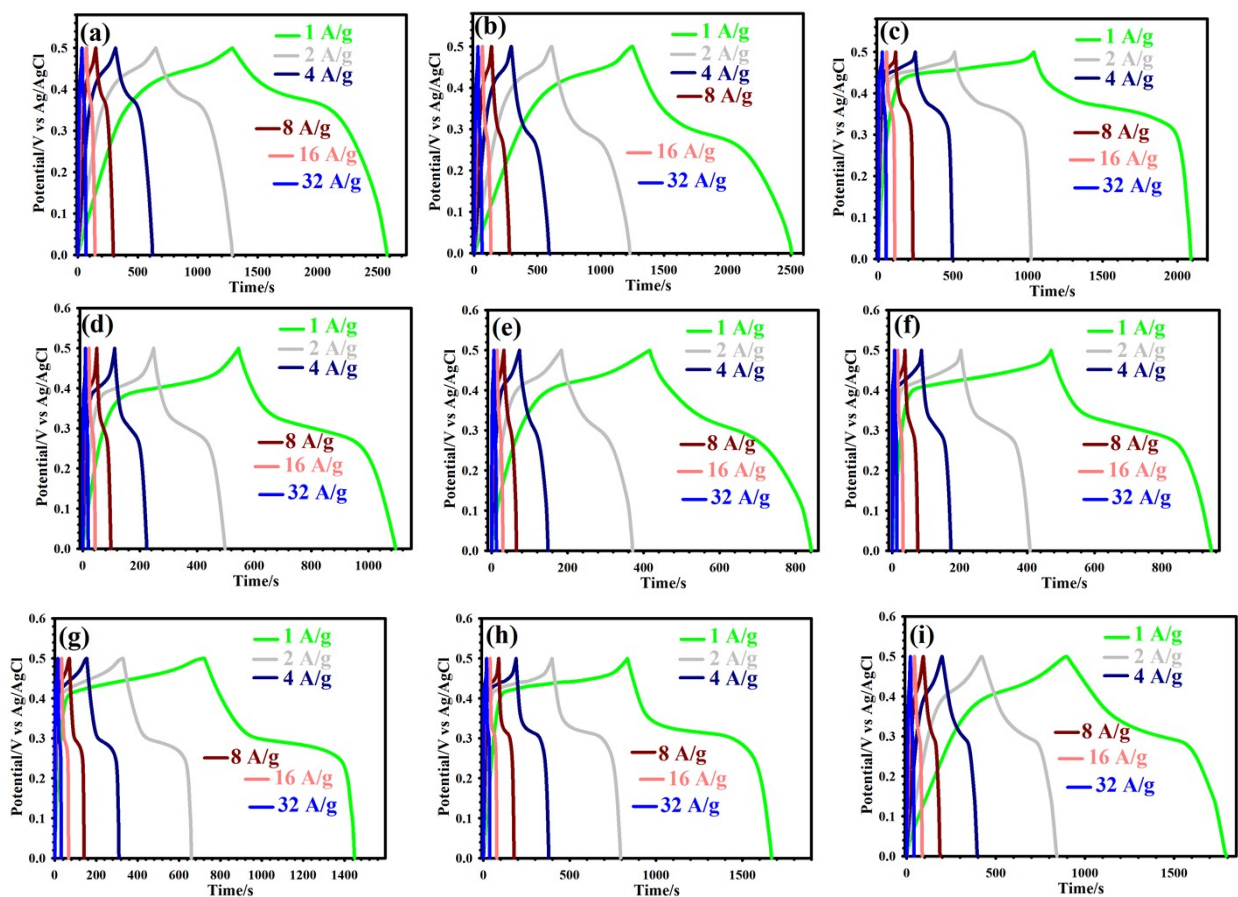

**Fig S26** (a) GCD curves of the RCCS-ZSH8-rGO1 electrode at various current densities from 1 to 32 A g<sup>-1</sup>. (b) GCD curves of the RCCS-ZSH8-rGO3 electrode at various current densities from 1 to 32 A g<sup>-1</sup>. (c) GCD curves of the RCCS-ZSH8 electrode at various current densities from 1 to 32 A g<sup>-1</sup>. (d) GCD curves of the CCS-HS electrode at various current densities from 1 to 32 A g<sup>-1</sup>. (e) GCD curves of the ZS electrode at various current densities from 1 to 32 A g<sup>-1</sup>. (f) GCD curves of the CCG-ZIF electrode at various current densities from 1 to 32 A g<sup>-1</sup>. (g) GCD curves of the RCCS-ZSH4 electrode at various current densities from 1 to 32 A g<sup>-1</sup>. (h) GCD curves of the RCCS-ZSH6 electrode at various current densities from 1 to 32 A g<sup>-1</sup>. (i) GCD curves of the RCCS-ZSH10 electrode at various current densities from 1 to 32 A g<sup>-1</sup>.

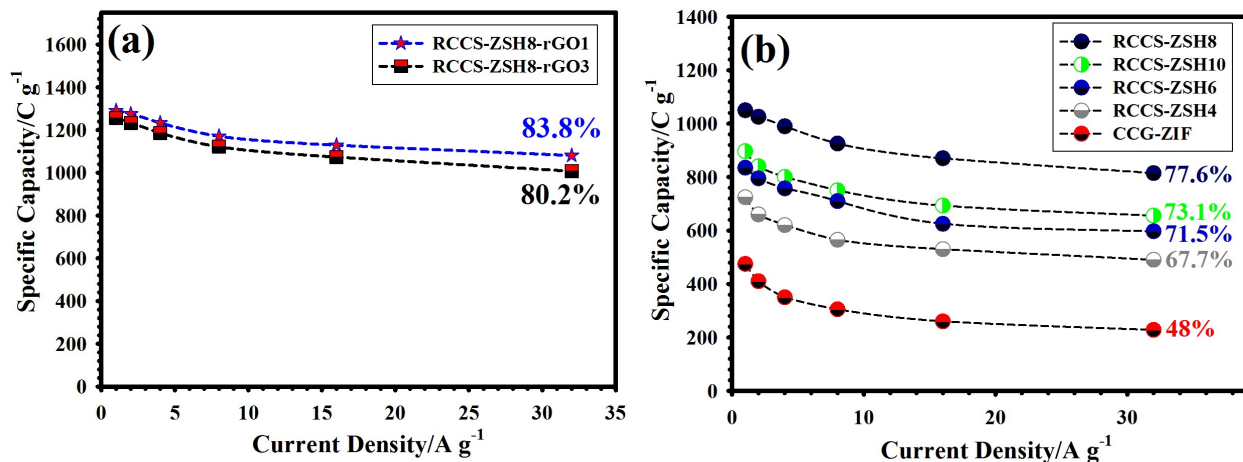

**Fig S27** (a) Rate capability of the RCCS-ZSH8-rGO1 and RCCS-ZSH8-rGO3. (b) Rate capability of the CCG-ZIF, RCCS-ZSH4, RCCS-ZSH6, RCCS-ZSH8, and RCCS-ZSH10.

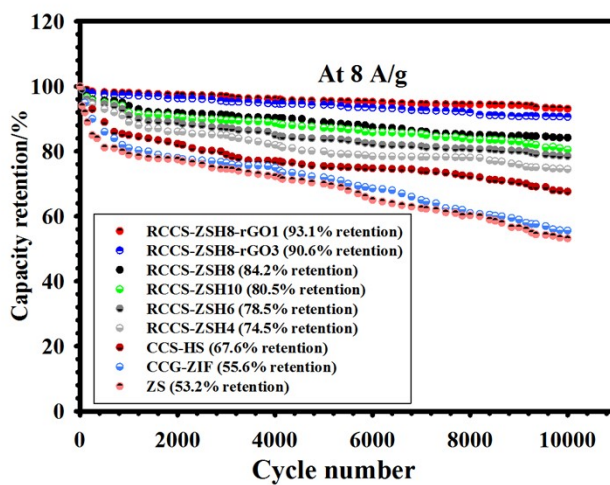

**Fig S28** Longevity of the RCCS-ZSH8-rGO1, RCCS-ZSH8-rGO3, RCCS-ZSH8, RCCS-ZSH10, RCCS-ZSH6, RCCS-ZSH4, CCS-SH, CCG-ZIF, ZS electrodes at 8 A g<sup>-1</sup>.

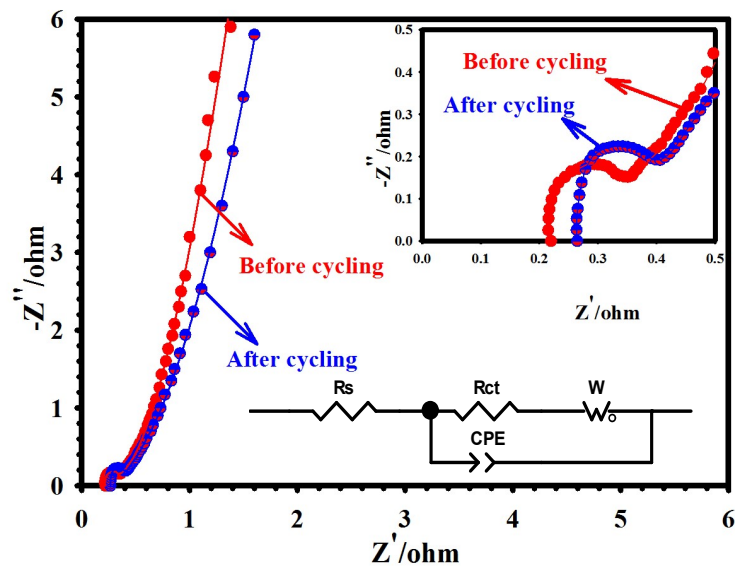

Fig S29 Nyquist plots of the RCCS-ZSH8-rGO2 before and after 10000 cycles.

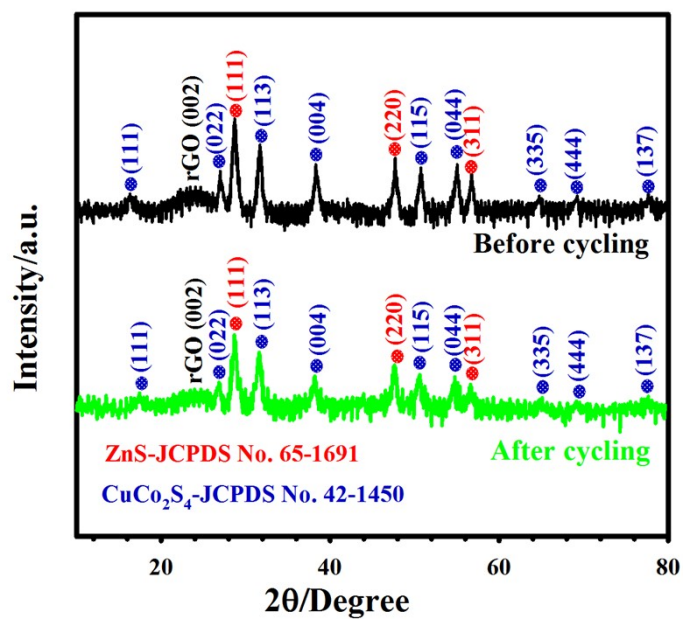

Fig S30 XRD pattern of the RCCS-ZSH8-rGO2 sample before and after 10000 cycles.

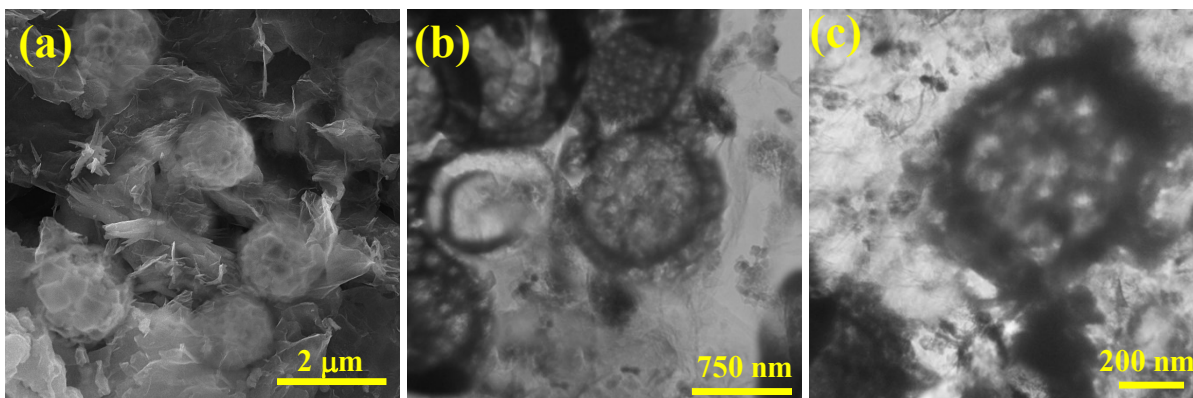

**Fig S31** (a) FE-SEM image of the RCCS-ZSH8-rGO2 sample after 10000 cycles. (b, c) TEM images of the RCCS-ZSH8-rGO sample after 10000 cycles.

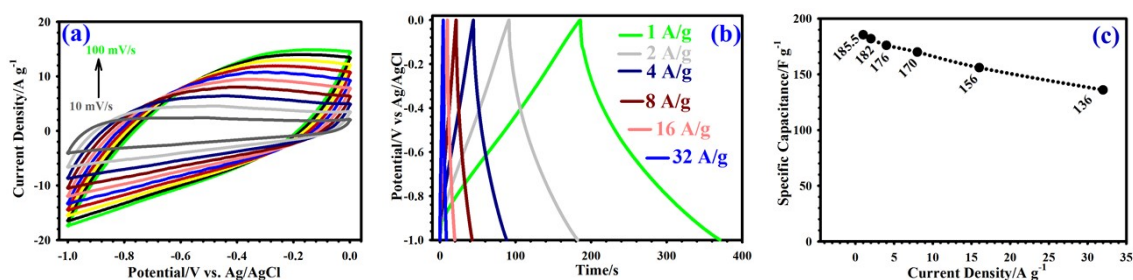

**Fig S32** (a) CV plots of the AC at various scan rates from 10 to 100  $\text{mV s}^{-1}$ . (b) GCD plots of the AC at various current densities from 1 to 32  $\text{A g}^{-1}$ . (c) Rate capability of the AC electrode.

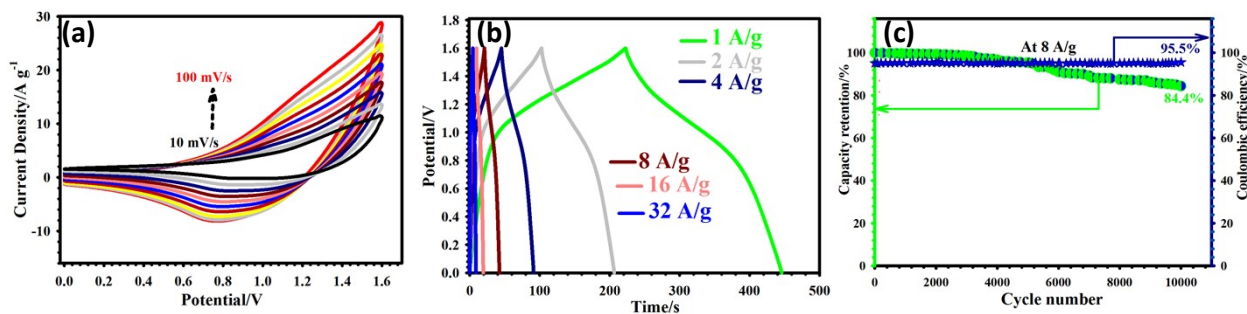

**Fig S33** (a) CV plots of the RCCS-ZSH8//AC device at various scan rates from 10 to 100  $\text{mV s}^{-1}$ . (b) GCD plots of the RCCS-ZSH8//AC device at various current densities from 1 to 32  $\text{A g}^{-1}$ . (c) Durability and coulombic efficiency of the RCCS-ZSH8//AC at 8  $\text{A g}^{-1}$



**Table S1** Comparison of the performance of the RCCS-ZSH8-rGO2 with other previously reported

| Composition                                                         | Capacity (C/g)               | Cycles, retention | Rate capability                | ED (Wh kg <sup>-1</sup> ) | Reference  |
|---------------------------------------------------------------------|------------------------------|-------------------|--------------------------------|---------------------------|------------|
| FSNCS                                                               | 559.3 at 1 A g <sup>-1</sup> | 50000, 88.9%      | 68.6% at 20 A g <sup>-1</sup>  | 28.8                      | 1          |
| NiCoMn-S-1.5                                                        | 657.7 at 1 A g <sup>-1</sup> | 50000, 90%        | 51.61% at 50 A g <sup>-1</sup> | 36.3                      | 2          |
| Ni-Co-sulfide                                                       | 603 at 1 A g <sup>-1</sup>   | 8000, 91.3%       | 67.4% at 15 A g <sup>-1</sup>  | 45.35                     | 3          |
| Co <sub>3</sub> S <sub>4</sub> @PPy                                 | 723 at 1 A g <sup>-1</sup>   | 1000, 98.6%       | 41.77% at 10 A g <sup>-1</sup> | 30.2                      | 4          |
| Co <sub>3</sub> S <sub>4</sub> /g-C <sub>3</sub> N <sub>4</sub> -10 | 415 at 0.5 A g <sup>-1</sup> | 5000, 75.6%       | 54.5% at 10 A g <sup>-1</sup>  | 37.7                      | 5          |
| NiCoMn-S                                                            | 661 at 1 A g <sup>-1</sup>   | 1000, 86.45%      | 66.56% at 50 A g <sup>-1</sup> | 42.1                      | 6          |
| Ni-Co-S-0.5/NC                                                      | 543.9 at 1 A g <sup>-1</sup> | 5000, 90.5%       | 67.3% at 20 A g <sup>-1</sup>  | 39.6                      | 7          |
| NiCo <sub>2</sub> S <sub>4</sub> /NGF                               | 558 at 1 A g <sup>-1</sup>   | 6000, 92.6%       | 55.5% at 20 A g <sup>-1</sup>  | 36.8                      | 8          |
| RCCS-ZSH8-rGO                                                       | 1346 at 1 A g <sup>-1</sup>  | 10000, 95.4 (3 E) | 86.6% at 32 A g <sup>-1</sup>  | 66.6                      | This study |

materials.

## References

- 1 J. Wang, J. Wang, G. Zhu, H. Xu, X. Zhang, Y. Zhao, J. Zhang, K. Jiang and A. Yu, Simple controllable foam structure NiCo<sub>2</sub>S<sub>4</sub> for high-performance hybrid supercapacitors, *J Energy Storage* 2022, **46**, 103907.
- 2 J. Zhang, C. Li, M. Fan, T. Ma, H. Chen and H. Wang, Two-dimensional nanosheets constituted trimetal Ni-Co-Mn sulfide nanoflower-like structure for high-performance hybrid supercapacitors, *Appl. Surf. Sci.* 2021, **565**, 150482.
- 3 Y. Deng, X. Wang, Z. Wang, X. Wang, Z. Li, L. Wang, C. Zhou, D. Chen and Y. Luo, Yolk–Shell Structured Nickel Cobalt Sulfide and Carbon Nanotube Composite for High-Performance Hybrid Supercapacitors, *Energy Fuels* 2021, **35**, 5342–5351.
- 4 W. Huo, X. Zhang, X. Liu, H. Liu, Y. Zhu, Y. Zhang, J. Ji, F. Dong and Y. Zhang, Construction of advanced 3D Co<sub>3</sub>S<sub>4</sub>@PPy nanowire anchored on nickel foam for high-performance electrochemical energy storage, *Electrochim. Acta* 2020, **334**, 135635.
- 5 W. Li, Y. Li, C. Yang, Q. Ma, K. Tao and L. Han, Fabrication of 2D/2D nanosheet heterostructures of ZIF-derived Co<sub>3</sub>S<sub>4</sub> and g-C<sub>3</sub>N<sub>4</sub> for asymmetric supercapacitors with superior cycling stability, *Dalton Trans* 2020, **49**, 14017-14029.
- 6 J. Cao, Y. Hu, Y. Zhu, H. Cao, M. Fan, C. Huang, K. Shu, M. He and H. C. Chen, Synthesis of mesoporous nickel-cobalt-manganese sulfides as electroactive materials for hybrid supercapacitors, *Chem. Eng. J* 2021, **405**, 126928.

7 M. Yi, C. Zhang, C. Cao, C. Xu, B. Sa, D. Cai and H. Zhan, MOF-Derived Hybrid Hollow Submicrospheres of Nitrogen-Doped Carbon-Encapsulated Bimetallic Ni–Co–S Nanoparticles for Supercapacitors and Lithium Ion Batteries, *Inorg. Chem.* 2019, **58**, 3916–3924.

8 Y. Chen, T. Liu, L. Zhang and J. Y, NiCo<sub>2</sub>S<sub>4</sub> Nanotubes Anchored 3D Nitrogen-Doped Graphene Framework as Electrode Material with Enhanced Performance for Asymmetric Supercapacitors, *ACS Sustainable Chem. Eng.* 2019, **7**, 11157–11165.
